# Supplementary material for: Reciprocal autoregulation by NFI occupancy and ETV1 promotes the developmental expression of dendrite-synapse genes in cerebellar granule neurons
Source: PubMed Central journal article supplement — Mol Biol Cell. 2016 May 1;27(9):1488–99. doi: 10.1091/mbc.E15-07-0476 (PMC4850036; doi:10.1091/mbc.e15-07-0476), 2016-05-01
Supplement: supp_E15-07-0476v1_CombinedSupMats.pdf [file supp_E15-07-0476v1_CombinedSupMats.pdf]

# Supplemental Materials

*Molecular Biology of the Cell*

Ding et al.

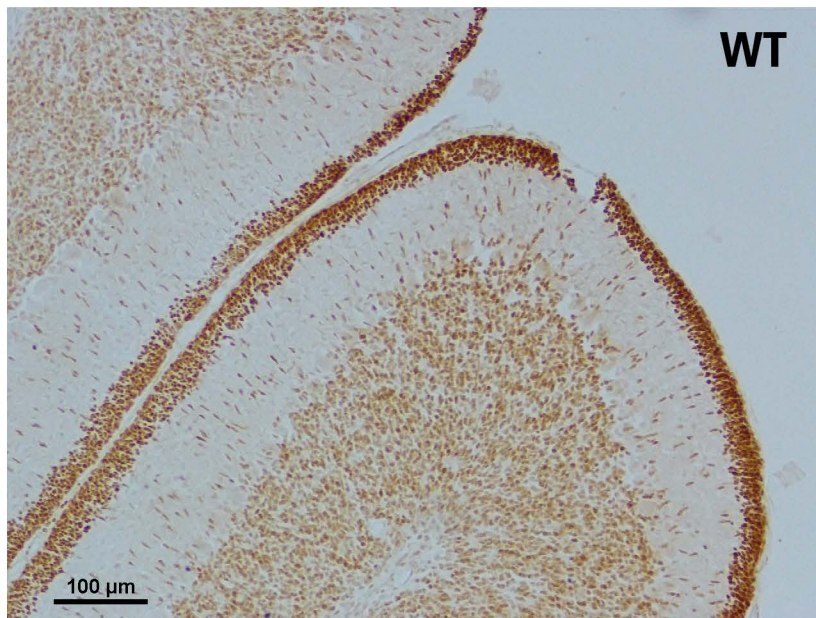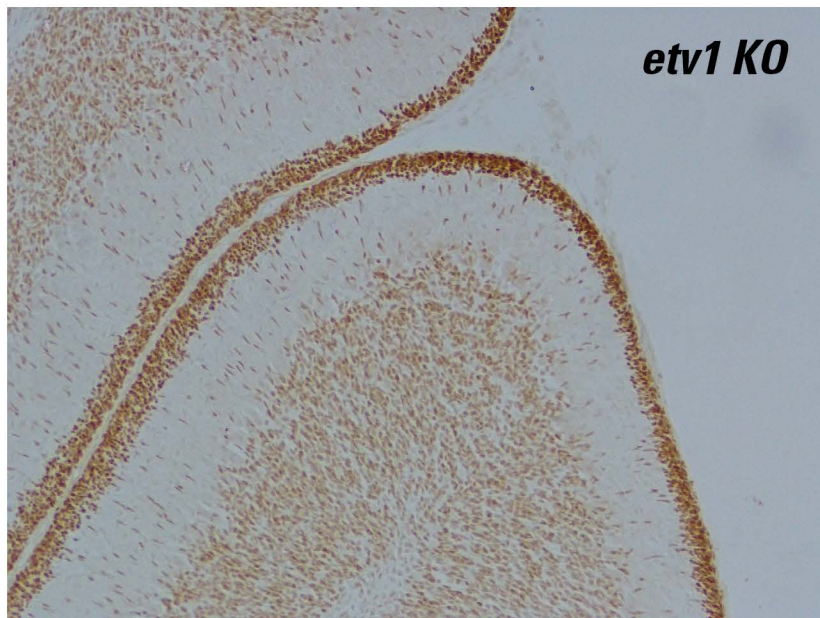

Ding et al, Supplemental Figure 1

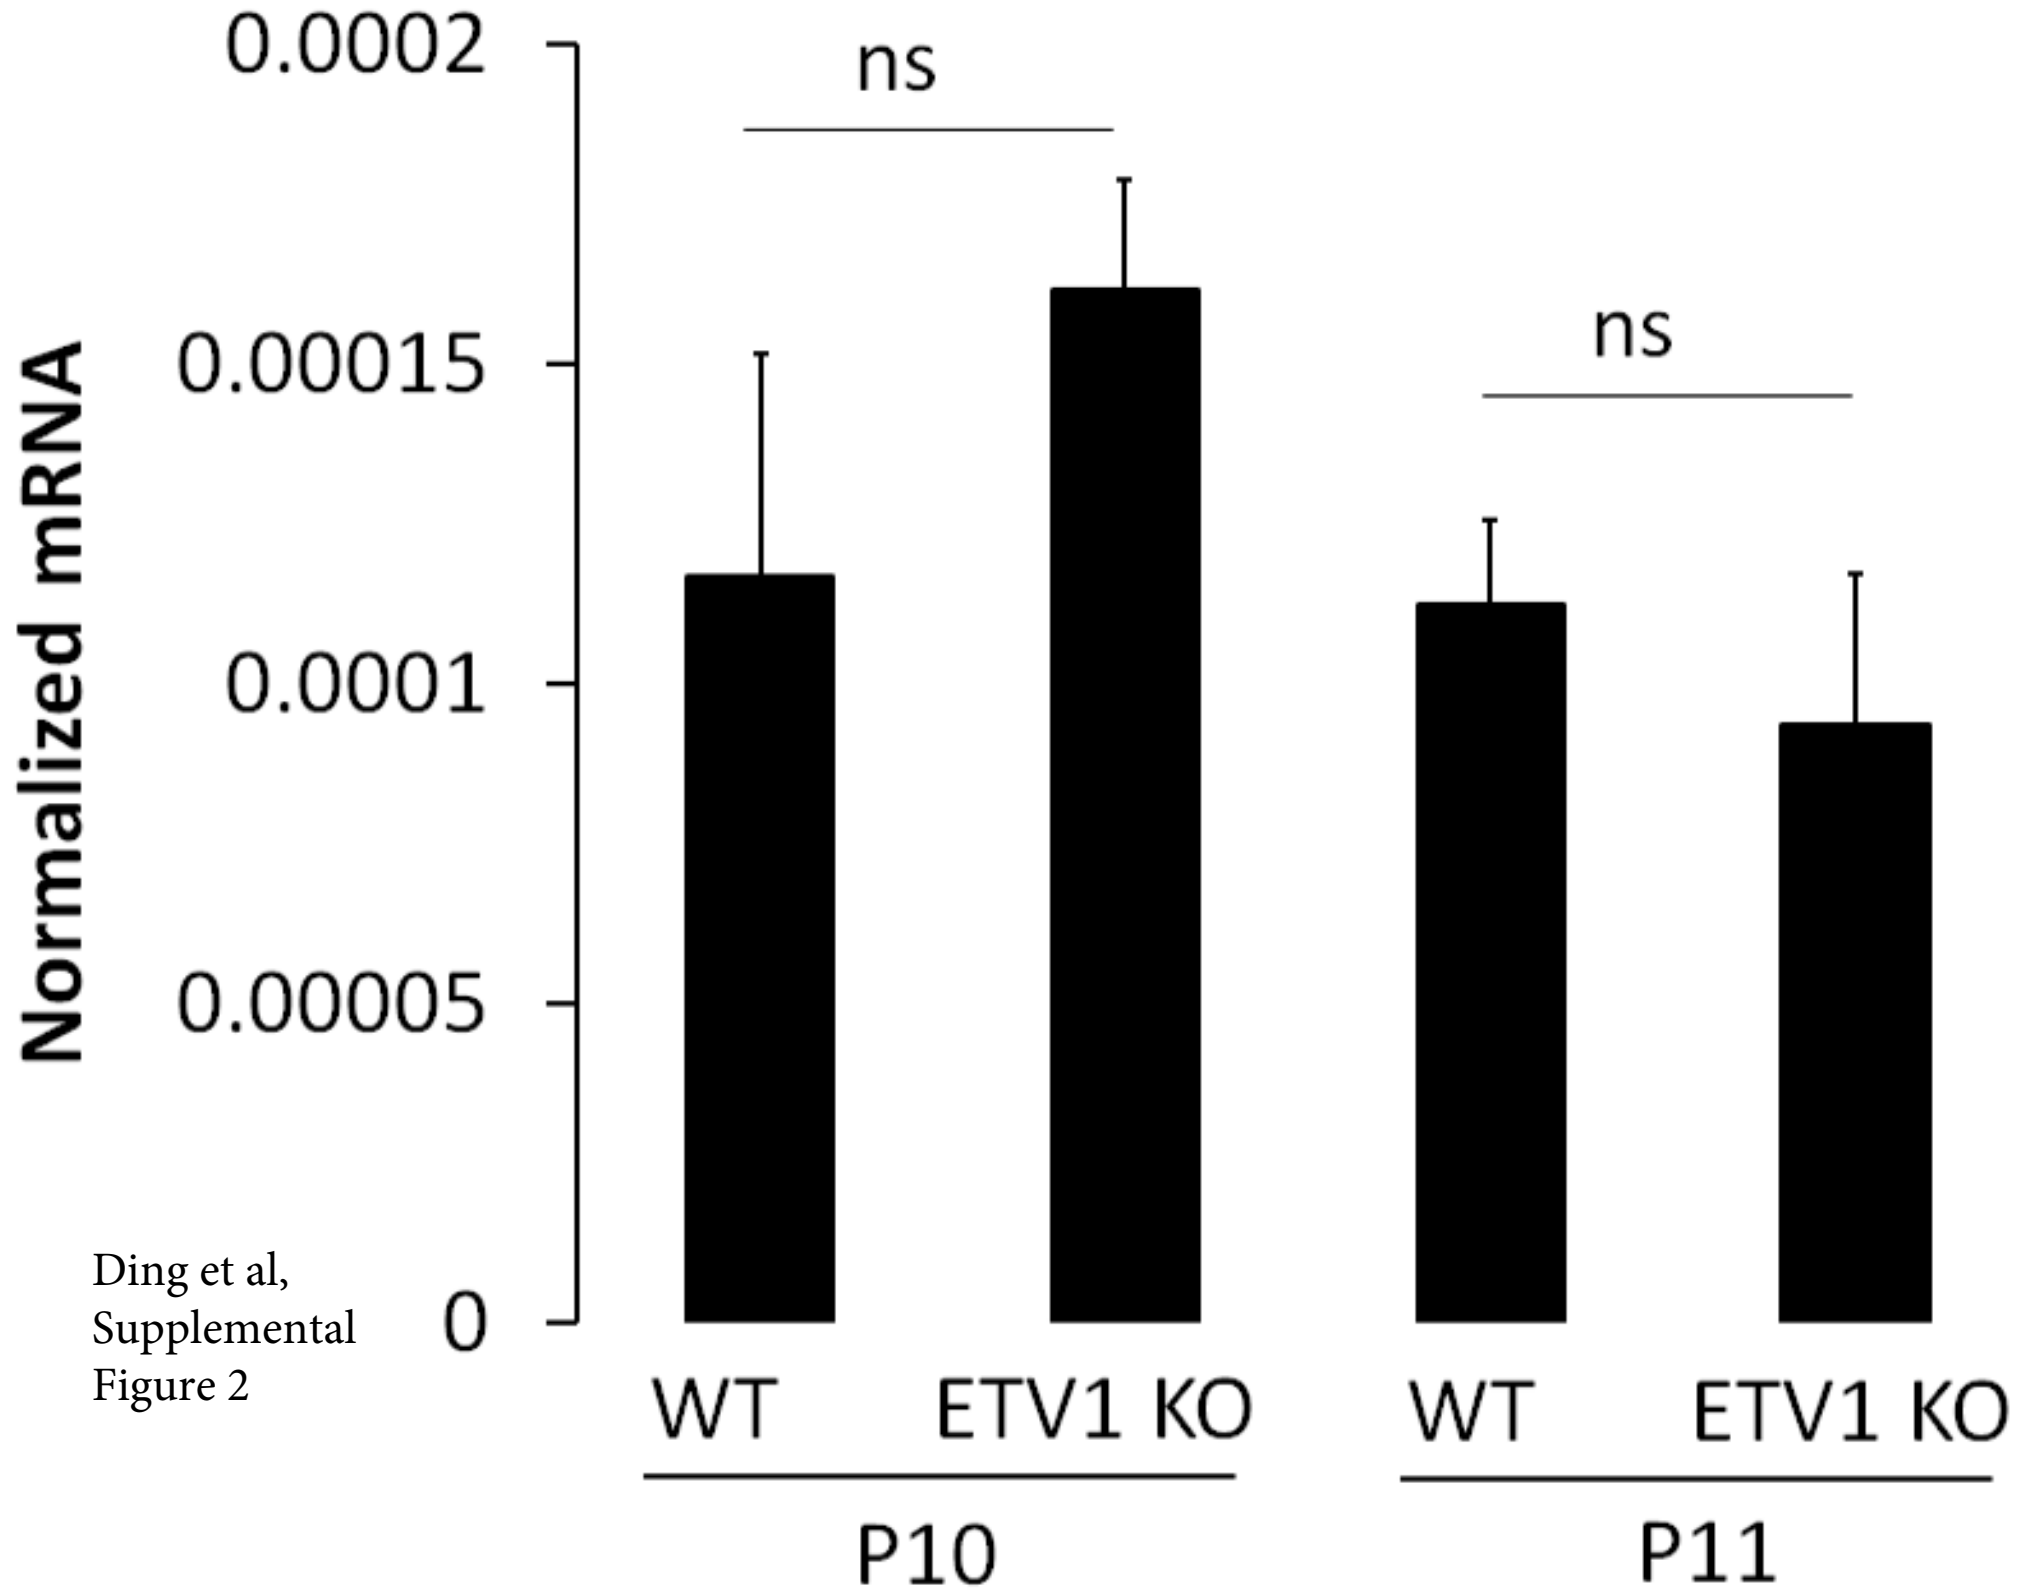

Ding et al,  
Supplemental  
Figure 2

**Supplemental Figure 1. Cerebellar organization is not significantly altered in developing *Etv1* knockout mice.** Sections from P10 wild-type (WT) and *Etv1* knockout cerebella (lobule VI/VII) were stained for Pax6 to identify CGNs and their progenitors within different layers. The thicknesses and cell densities within different layers were not obviously disrupted in the absence of ETV1.

**Supplemental Figure 2. Cerebellar levels of NFATc4 mRNA are not significantly altered by *Etv1*-deficiency.** NFATc4 transcripts were assayed in wild-type (WT) and *Etv1* knockout (KO) mouse cerebella at the indicated ages using qRT-PCR. ns: not significantly different.
